# Supplementary material
Source: PubMed Central journal article supplement (PMC6343467)
Supplement: dey364_supplement_figure1.pdf [file dey364_supplement_figure1.pdf]

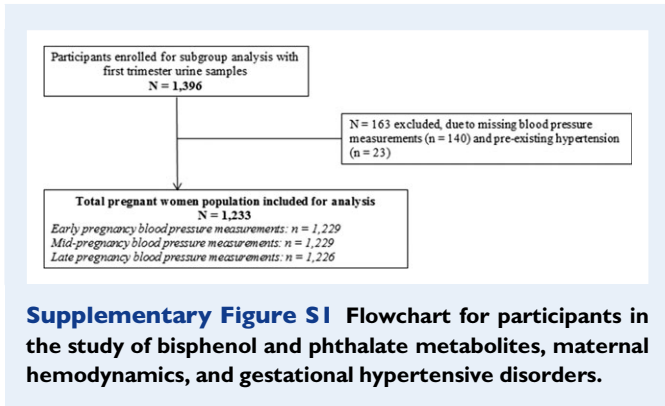

**Supplementary Figure S1** Flowchart for participants in the study of bisphenol and phthalate metabolites, maternal hemodynamics, and gestational hypertensive disorders.
