# Supplementary material
Source: PubMed Central journal article supplement (PMC6343467)
Supplement: dey364_supplement_figure2.pdf [file dey364_supplement_figure2.pdf]

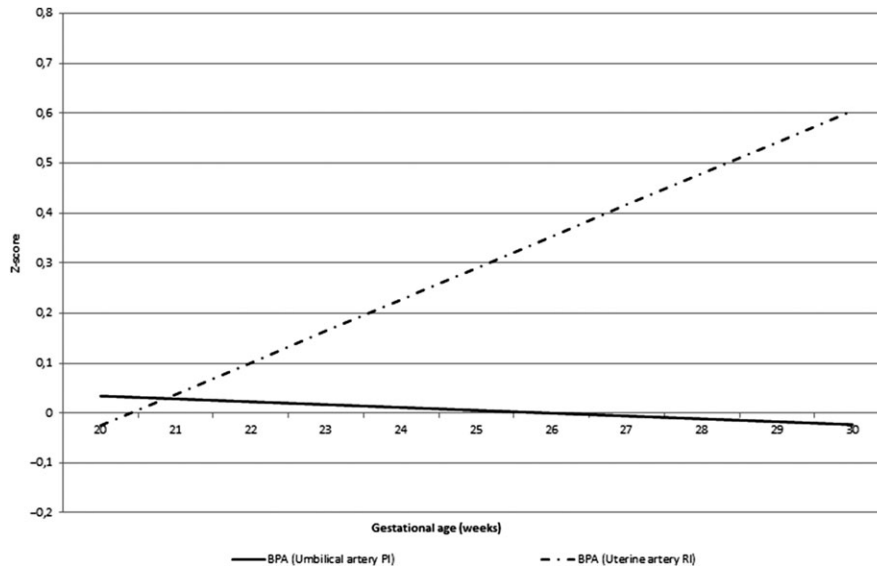

**Supplementary Figure S2 Longitudinal associations of bisphenol A concentrations and placental hemodynamic function marker Z-scores.** Figure represents the change in umbilical artery pulsatility index Z-score and uterine artery resistance index Z-score per each natural log unit increase in bisphenol A (BPA). Based on repeated measurement analysis (hemodynamic function marker Z-score =  $\beta_0 + \beta_1 \times \log \text{unit compound} + \beta_2 \times \text{gestational age} + \beta_3 \times \log \text{unit compound} \times \text{gestational age}$  (+  $\beta_x \times \text{additional covariates}$ )). BPA was associated with both umbilical artery pulsatility index Z-score pattern as uterine artery resistance index Z-score pattern, but contradictory effects were observed. The exact regression coefficients for gestational age-independent (intercept) and gestational age-dependent differences (interaction tertile and gestational age) are given for all tested bisphenols and phthalate concentrations in Supplementary Table SVI.
