# Supplementary material
Source: PubMed Central journal article supplement (PMC6343467)
Supplement: dey364_supplement_figure4.pdf [file dey364_supplement_figure4.pdf]

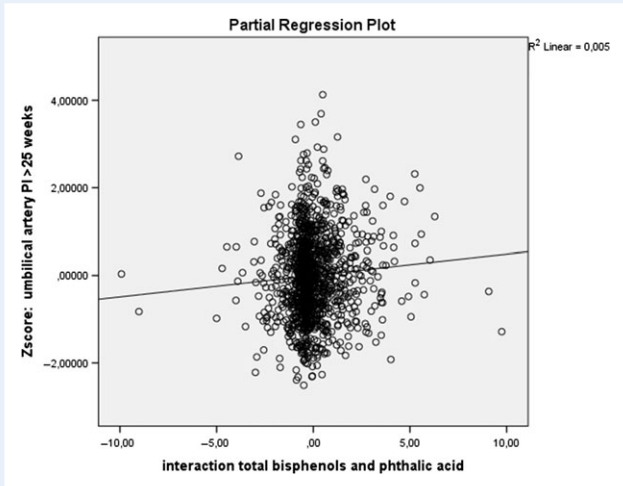

**Supplementary Figure S4 Partial regression plot for significant interaction of total bisphenols and phthalic acid.**

Partial regression plot showing the interaction between concentrations of total bisphenols and phthalic acid for late pregnancy umbilical artery PI Z-score ( $P$ -value  $< 0.1$ ).
