# Supplementary material
Source: PubMed Central journal article supplement (PMC6343467)
Supplement: dey364_supplement_table1.pdf [file dey364_supplement_table1.pdf]

**Supplementary Table SI Bisphenol and phthalate urinary concentrations (n = 1233 women).**

|                                                                | Median (IQR) (ng/ml)      | Percentage of values below the LOD |
|----------------------------------------------------------------|---------------------------|------------------------------------|
| Total bisphenols <sup>a</sup>                                  | 9.22 (3.51, 20.28)        |                                    |
| Bisphenol A (BPA)                                              | 1.65 (0.72, 3.58)         | 21.7                               |
| Bisphenol S (BPS)                                              | 0.35 (0.17, 1.03)         | 31.5                               |
| Bisphenol F (BPF)                                              | 0.57 (0.30, 1.32)         | 60.0                               |
| Phthalic acid (PA)                                             | 56.99 (30.62, 124.05)     | 0.3                                |
| Low molecular weight (LMW) metabolites <sup>a</sup>            | 1087.42 (423.91, 2925.28) |                                    |
| Monomethylphthalate (mMP)                                      | 5.43 (2.75, 9.75)         | 0.2                                |
| Monoethylphthalate (mEP)                                       | 137.85 (41.59, 484.50)    | 0.1                                |
| Mono-isobutylphthalate (mIBP)                                  | 20.69 (9.44, 45.33)       | 0.2                                |
| Mono-n-butylphthalate (mBP)                                    | 15.58 (6.89, 31.00)       | 0.7                                |
| High molecular weight (HMW) metabolites <sup>a</sup>           | 219.66 (110.84, 405.51)   |                                    |
| <i>Di-2-ethylhexylphthalate (DEHP) metabolites<sup>a</sup></i> | 171.33 (87.61, 323.30)    |                                    |
| Mono-(2-ethyl-5-carboxypentyl)phthalate (mECP)                 | 15.96 (8.08, 31.60)       | 0.2                                |
| Mono-(2-ethyl-5-hydroxyhexyl)phthalate (mEHHP)                 | 11.76 (5.67, 22.92)       | 0.2                                |
| Mono-(2-ethyl-5-oxohexyl)phthalate (mEOHP)                     | 7.66 (3.46, 15.48)        | –                                  |
| Mono-[(2-carboxymethyl)hexyl]phthalate (mCMHP)                 | 13.90 (7.55, 26.26)       | 0.1                                |
| <i>Di-n-octylphthalate (DNOP)<sup>a</sup></i>                  | 5.72 (3.10, 11.03)        |                                    |
| Mono(3-carboxypropyl)phthalate (mCPP)                          | 1.44 (0.78, 2.77)         | –                                  |
| <i>Other high molecular weight metabolites</i>                 |                           |                                    |
| Monobenzylphthalate (mBzP)                                     | 6.55 (3.06, 12.81)        | 8.3                                |
| Mono-hexylphthalate (mHxP)                                     | 0.33 (0.16, 0.63)         | 24.0                               |
| Mono-2-heptylphthalate (mHpP)                                  | 1.09 (0.60, 2.29)         | 36.7                               |

LOD = limit of detection.

<sup>a</sup>Groups are molar concentrations in nmol/L with non-detectable levels of separate metabolites imputed as LOD/sqrt(2). Separate metabolites are included only if <80% of values was below the LOD.
