# Supplementary material
Source: PubMed Central journal article supplement (PMC6343467)
Supplement: dey364_supplement_table2.pdf [file dey364_supplement_table2.pdf]

**Supplementary Table SII Maternal characteristics of participants and eligible non-participants.**

|                                      | <b>Sample n = 1233 (at least one blood pressure measurement in pregnancy and no pre-existing hypertension)</b> | <b>Generation R n = 4056 (singleton live born children with inclusion &lt;18w + visit F@5 + at least one blood pressure measurement in pregnancy and no pre-existing hypertension)</b> |
|--------------------------------------|----------------------------------------------------------------------------------------------------------------|----------------------------------------------------------------------------------------------------------------------------------------------------------------------------------------|
| Pre-eclampsia (%)                    | 2.0                                                                                                            | 1.9                                                                                                                                                                                    |
| Gestational hypertension (%)         | 3.3                                                                                                            | 4.5                                                                                                                                                                                    |
| Systolic blood pressure trimester 1  | 115.7 (11.6)                                                                                                   | 115.6 (11.9)                                                                                                                                                                           |
| Diastolic blood pressure trimester 1 | 67.9 (9.3)                                                                                                     | 68.1 (9.3)                                                                                                                                                                             |
| Systolic blood pressure trimester 2  | 115.9 (11.7)                                                                                                   | 117.1 (11.9)                                                                                                                                                                           |
| Diastolic blood pressure trimester 2 | 66.8 (9.8)                                                                                                     | 67.2 (9.3)                                                                                                                                                                             |
| Systolic blood pressure trimester 3  | 117.2 (11.4)                                                                                                   | 118.7 (11.8)                                                                                                                                                                           |
| Diastolic blood pressure trimester 3 | 68.8 (9.0)                                                                                                     | 69.2 (9.1)                                                                                                                                                                             |
| Maternal pre-pregnancy BMI*          | 22.6 (20.8, 25.1)                                                                                              | 22.6 (20.8, 25.2)                                                                                                                                                                      |

Values represent mean (SD) or valid percentages.

\*Median (IQR).
