# Supplementary material
Source: PubMed Central journal article supplement (PMC6343467)
Supplement: dey364_supplement_table3.pdf [file dey364_supplement_table3.pdf]

**Supplementary Table SIII Associations of individual early pregnancy phthalate urine concentrations with placental angiogenic markers.**

|                                  | <b>Placental growth factor (PIGF) &lt;18 weeks (pg/ml), <math>\beta</math> (95% CI) (n = 1143)</b> | <b>Soluble fms-like tyrosine kinase (sFlt) –1 &lt;18 weeks (ng/ml), <math>\beta</math> (95% CI) (n = 1143)</b> | <b>sFlt-1: PIGF ratio &lt;18 weeks, <math>\beta</math> (95% CI) (n = 1143)</b> | <b>Placental growth factor (PIGF) 18–25 weeks (pg/ml), <math>\beta</math> (95% CI) (n = 1173)</b> | <b>Soluble fms-like tyrosine kinase (sFlt)–1 18–25 weeks (ng/ml), <math>\beta</math> (95% CI) (n = 1173)</b> | <b>sFlt-1: PIGF ratio 18–25 weeks, <math>\beta</math> (95% CI) (n = 1173)</b> |
|----------------------------------|----------------------------------------------------------------------------------------------------|----------------------------------------------------------------------------------------------------------------|--------------------------------------------------------------------------------|---------------------------------------------------------------------------------------------------|--------------------------------------------------------------------------------------------------------------|-------------------------------------------------------------------------------|
| <i>LMW phthalate metabolites</i> |                                                                                                    |                                                                                                                |                                                                                |                                                                                                   |                                                                                                              |                                                                               |
| mMP metabolites                  | 0.00 (–0.03, 0.06)                                                                                 | 0.04 (–0.09, 0.31)                                                                                             | 18.33 (–55.72, 187.59)                                                         | –0.05 (–0.12, 0.28)                                                                               | 0.02 (–0.11, 0.65)                                                                                           | 9.75 (–11.64, 139.11)                                                         |
| mEP metabolites                  | 0.01 (–0.02, 0.05)                                                                                 | 0.07 (–0.03, 0.25)                                                                                             | 24.39 (–26.76, 137.35)                                                         | 0.15 (0.01, 0.52)*                                                                                | 0.16 (–0.00, 0.74)                                                                                           | –0.80 (–10.53, 72.71)                                                         |
| mIBP metabolites                 | 0.02 (0.01, 0.08)                                                                                  | 0.06 (–0.06, 0.31)                                                                                             | –0.02 (–61.08, 143.62)                                                         | 0.16 (–0.00, 0.65)                                                                                | 0.18 (–0.02, 0.95)                                                                                           | –0.06 (–14.04, 103.14)                                                        |
| mBP metabolites                  | –0.03 (–0.05, 0.01)                                                                                | 0.13 (–0.02, 0.40)                                                                                             | 109.93 (12.26, 307.42)*                                                        | 0.06 (–0.06, 0.46)                                                                                | 0.11 (–0.06, 0.78)                                                                                           | 4.78 (–12.10, 114.88)                                                         |
| <i>HMW phthalate metabolites</i> |                                                                                                    |                                                                                                                |                                                                                |                                                                                                   |                                                                                                              |                                                                               |
| mECPP metabolites                | –0.03 (–0.06, 0.02)                                                                                | 0.14 (–0.02, 0.44)                                                                                             | 118.28 (10.24, 338.48)*                                                        | 0.04 (–0.08, 0.47)                                                                                | 0.08 (–0.09, 0.80)                                                                                           | 4.40 (–14.28, 129.49)                                                         |
| mEHHP metabolites                | –0.03 (–0.06, 0.01)                                                                                | 0.09 (–0.05, 0.36)                                                                                             | 97.48 (1.65, 294.51)*                                                          | 0.02 (–0.08, 0.40)                                                                                | 0.08 (–0.08, 0.75)                                                                                           | 7.40 (–11.98, 128.43)                                                         |
| mEOHP metabolites                | –0.03 (–0.05, 0.02)                                                                                | 0.12 (–0.02, 0.40)                                                                                             | 105.12 (7.80, 302.98)*                                                         | 0.04 (–0.07, 0.42)                                                                                | 0.11 (–0.06, 0.80)                                                                                           | 8.16 (–11.18, 126.44)                                                         |
| mCMHP metabolites                | –0.06 (–0.08, –0.02)*                                                                              | 0.24 (0.04, 0.62)*†                                                                                            | 216.96 (70.25, 500.36)*†                                                       | 0.00 (–0.11, 0.44)                                                                                | 0.15 (–0.06, 1.03)                                                                                           | 19.71 (–10.11, 182.53)                                                        |
| mCPP metabolites                 | –0.01 (–0.04, 0.05)                                                                                | 0.13 (–0.04, 0.46)                                                                                             | 82.83 (–19.72, 300.46)                                                         | 0.04 (–0.09, 0.49)                                                                                | 0.10 (–0.08, 0.89)                                                                                           | 6.49 (–14.24, 141.22)                                                         |
| mBzP metabolites                 | 0.01 (–0.02, 0.06)                                                                                 | 0.17 (0.03, 0.42)*†                                                                                            | 69.03 (–3.06, 217.28)                                                          | 0.12 (–0.01, 0.49)                                                                                | 0.22 (0.02, 0.92)*                                                                                           | 12.57 (–6.23, 113.49)                                                         |
| mHxP metabolites                 | 0.01 (–0.02, 0.06)                                                                                 | 0.03 (–0.08, 0.25)                                                                                             | –0.38 (–54.90, 127.80)                                                         | 0.06 (–0.05, 0.42)                                                                                | 0.04 (–0.08, 0.58)                                                                                           | –2.91 (–13.36, 82.73)                                                         |
| mHpP metabolites                 | 0.01 (–0.02, 0.07)                                                                                 | 0.08 (–0.06, 0.35)                                                                                             | 28.30 (–47.90, 199.26)                                                         | –0.12 (–0.15, 0.13)                                                                               | 0.11 (–0.07, 0.86)                                                                                           | 33.65 (–3.40, 207.80)                                                         |

Values are regression coefficients (95% CI) from multivariable linear regression models that reflect the difference in placental angiogenic markers per log unit increase in urinary phthalate metabolite concentrations.

Models are adjusted for maternal age, maternal pre-pregnancy BMI, parity, ethnicity, education, maternal smoking, maternal alcohol, folic acid supplementation, gestational age at time of measurement and creatinine. \*P-value<0.05.

†Significant with Bonferroni correction.
