# Supplementary material
Source: PubMed Central journal article supplement (PMC6343467)
Supplement: dey364_supplement_table4.pdf [file dey364_supplement_table4.pdf]

**Supplementary Table SIV** Longitudinal associations of bisphenol and phthalate concentrations and placental angiogenic markers<sup>a</sup>.

|                              | Placental growth factor (PIGF)<br>(pg/ml), $\beta$ (95% CI) (n = 1218) |                     | Soluble fms-like tyrosine kinase<br>(sFlt)-1 (ng/ml), $\beta$ (95% CI)<br>(n = 1218) |                     | sFlt-1: PIGF ratio, $\beta$ (95% CI)<br>(n = 1218) |                      |
|------------------------------|------------------------------------------------------------------------|---------------------|--------------------------------------------------------------------------------------|---------------------|----------------------------------------------------|----------------------|
|                              | Intercept <sup>b</sup>                                                 | Slope <sup>c</sup>  | Intercept <sup>b</sup>                                                               | Slope <sup>c</sup>  | Intercept <sup>b</sup>                             | Slope <sup>c</sup>   |
| Total bisphenols             | 0.11 (-0.00, 0.29)                                                     | -0.01 (-0.01, 0.00) | 0.05 (-0.49, 1.83)                                                                   | -0.01 (-0.05, 0.11) | -108.41 (-206.14, 124.00)                          | 4.68 (-4.06, 21.47)  |
| Bisphenol A                  | 0.09 (-0.01, 0.24)                                                     | -0.00 (-0.01, 0.00) | -0.02 (-0.52, 1.14)                                                                  | 0.00 (-0.00, 0.01)  | -78.00 (-154.48, 89.66)                            | 2.44 (-3.72, 13.88)  |
| Bisphenol S                  | 0.05 (-0.04, 0.18)                                                     | -0.00 (-0.01, 0.00) | -0.05 (-0.50, 1.12)                                                                  | 0.01 (-0.04, 0.08)  | -44.66 (-125.31, 128.28)                           | 2.18 (-3.63, 13.14)  |
| Phthalic acid                | -0.02 (-0.11, 0.17)                                                    | 0.00 (-0.01, 0.01)  | 0.39 (-0.16, 3.10)                                                                   | -0.03 (-0.04, 0.08) | 34.63 (-101.84, 362.36)                            | 1.34 (-5.88, 17.80)  |
| LMW phthalate<br>metabolites | -0.01 (-0.08, 0.16)                                                    | 0.00 (-0.00, 0.01)  | 0.23 (-0.12, 2.89)                                                                   | -0.01 (-0.02, 0.10) | 34.32 (-68.19, 315.03)                             | -1.48 (-5.68, 10.74) |
| HMW phthalate<br>metabolites | -0.05 (-0.15, 0.17)                                                    | 0.00 (-0.01, 0.02)  | 0.34 (-0.14, 4.61)                                                                   | -0.01 (-0.02, 0.17) | 134.98 (-23.62, 547.22)                            | -3.71 (-7.56, 9.05)  |
| DEHP<br>metabolites          | -0.08 (-0.17, 0.13)                                                    | 0.00 (-0.00, 0.02)  | 0.36 (-0.14, 4.31)                                                                   | -0.02 (-0.03, 0.14) | 138.94 (-18.38, 529.70)                            | -4.50 (-8.04, 7.07)  |
| DNOP<br>metabolites          | 0.05 (-0.08, 0.25)                                                     | -0.00 (-0.01, 0.01) | 0.61 (-0.24, 3.07)                                                                   | -0.04 (-0.07, 0.07) | 34.97 (-124.42, 370.19)                            | 0.18 (-8.03, 16.57)  |

<sup>a</sup>Change in PIGF, sFlt-1 and sFlt:PIGF ratio per natural log unit increase of Total bisphenols/BPA/BPS/Phthalic acid/LMW/HMW/DEHP/DNOP metabolite concentrations based on repeated measurement analysis (angiogenic marker value =  $\beta_0 + \beta_1 \times \log \text{unit compound} + \beta_2 \times \text{gestational age} + \beta_3 \times \log \text{unit compound} \times \text{gestational age} (+ \beta_x \times \text{additional covariates})$ ).

<sup>b</sup>Values are regression coefficients (95% CI) from multivariable unbalanced repeated measurement regression models that reflect the change in angiogenic marker per natural log unit increase of Total bisphenols/BPA/BPS/Phthalic acid/LMW/HMW/DEHP/DNOP metabolite concentrations ( $\beta_2$ ).

<sup>c</sup>Values are regression coefficients (95% CI) from multivariable unbalanced repeated measurement regression models that reflect the change in angiogenic marker per natural log unit increase of Total bisphenols/BPA/BPS/Phthalic acid/LMW/HMW/DEHP/DNOP metabolite concentrations per gestational age in weeks ( $\beta_4$ ).

Models were adjusted for maternal age, maternal pre-pregnancy BMI, parity, ethnicity, education, maternal smoking, maternal alcohol, folic acid supplementation and urinary creatinine.
