# Supplementary material
Source: PubMed Central journal article supplement (PMC6343467)
Supplement: dey364_supplement_table5.pdf [file dey364_supplement_table5.pdf]

**Supplementary Table SV Associations of individual early pregnancy phthalate urine concentrations with placental hemodynamic function and weight.**

|                                  | <b>Umbilical artery pulsatility index 18–25 weeks, SD (95% CI) (n = 1184)</b> | <b>Uterine artery resistance index 18–25 weeks, SD (95% CI) (n = 1019)</b> | <b>Umbilical artery pulsatility index &gt;25 weeks, SD (95% CI) (n = 1186)</b> | <b>Uterine artery resistance index &gt;25 weeks, SD (95% CI) (n = 755)</b> | <b>Notching, OR (95% CI) (n = 83/793)</b> | <b>Placental weight, g (95% CI) (n = 930)</b> |
|----------------------------------|-------------------------------------------------------------------------------|----------------------------------------------------------------------------|--------------------------------------------------------------------------------|----------------------------------------------------------------------------|-------------------------------------------|-----------------------------------------------|
| <i>LMW phthalate metabolites</i> |                                                                               |                                                                            |                                                                                |                                                                            |                                           |                                               |
| mMP metabolites                  | 0.01 (−0.05, 0.06)                                                            | 0.01 (−0.05, 0.07)                                                         | −0.05 (−0.10, 0.01)                                                            | 0.03 (−0.04, 0.10)                                                         | 0.85 (0.69, 1.05)                         | −0.79 (−9.23, 7.64)                           |
| mEP metabolites                  | 0.02 (−0.02, 0.05)                                                            | 0.01 (−0.03, 0.05)                                                         | 0.01 (−0.02, 0.05)                                                             | 0.01 (−0.03, 0.06)                                                         | 0.90 (0.78, 1.04)                         | −2.77 (−8.42, 2.88)                           |
| mIBP metabolites                 | 0.00 (−0.05, 0.05)                                                            | 0.02 (−0.03, 0.08)                                                         | −0.03 (−0.07, 0.02)                                                            | 0.05 (−0.01, 0.11)                                                         | 0.76 (0.62, 0.93)*†                       | −2.58 (−10.46, 5.30)                          |
| mBP metabolites                  | −0.01 (−0.06, 0.04)                                                           | 0.03 (−0.02, 0.09)                                                         | −0.02 (−0.07, 0.03)                                                            | 0.08 (0.02, 0.15)*                                                         | 0.79 (0.65, 0.96)*                        | −1.73 (−9.41, 5.95)                           |
| <i>HMW phthalate metabolites</i> |                                                                               |                                                                            |                                                                                |                                                                            |                                           |                                               |
| mECPP metabolites                | 0.03 (−0.03, 0.08)                                                            | 0.05 (−0.02, 0.11)                                                         | −0.03 (−0.09, 0.02)                                                            | 0.08 (0.00, 0.15)*                                                         | 0.92(0.73, 1.16)                          | −2.44 (−11.39, 6.52)                          |
| mEHHP metabolites                | 0.03 (−0.02, 0.08)                                                            | 0.04 (−0.02, 0.10)                                                         | −0.05 (−0.10, 0.01)                                                            | 0.06 (−0.01, 0.13)                                                         | 0.85 (0.68, 1.05)                         | −1.71 (−10.05, 6.63)                          |
| mEOHP metabolites                | 0.01 (−0.04, 0.06)                                                            | 0.05 (−0.01, 0.10)                                                         | −0.05 (−0.10, 0.00)                                                            | 0.06 (−0.01, 0.12)                                                         | 0.86 (0.70, 1.06)                         | −0.81 (−8.86, 7.24)                           |
| mCMHP metabolites                | −0.00 (−0.06, 0.06)                                                           | 0.03 (−0.04, 0.09)                                                         | −0.07 (−0.13, −0.01)*                                                          | 0.06 (−0.02, 0.14)                                                         | 0.80 (0.62, 1.03)                         | −3.60 (−13.23, 6.02)                          |
| mCPP metabolites                 | 0.03 (−0.03, 0.09)                                                            | 0.03 (−0.03, 0.09)                                                         | −0.02 (−0.08, 0.04)                                                            | 0.05 (−0.02, 0.13)                                                         | 0.76 (0.60, 0.97)*                        | −2.53 (−11.68, 6.62)                          |
| mBzP metabolites                 | −0.01 (−0.05, 0.03)                                                           | 0.02 (−0.02, 0.06)                                                         | −0.03 (−0.07, 0.01)                                                            | 0.00 (−0.05, 0.05)                                                         | 0.85 (0.73, 0.99)*                        | −1.81 (−7.91, 4.29)                           |
| mHxP metabolites                 | 0.03 (−0.02, 0.07)                                                            | 0.04 (−0.01, 0.08)                                                         | −0.02 (−0.07, 0.02)                                                            | 0.04 (−0.02, 0.09)                                                         | 0.84 (0.70, 1.01)                         | −0.49 (−7.64, 6.67)                           |
| mHpP metabolites                 | 0.06 (0.01, 0.11)*                                                            | 0.02 (−0.03, 0.08)                                                         | −0.02 (−0.07, 0.04)                                                            | 0.02 (−0.05, 0.09)                                                         | 0.88 (0.70, 1.10)                         | −10.02 (−18.45, −1.59)*                       |

Values are based on multivariable linear and logistic regression models that reflect differences or OR and 95% CI in placental hemodynamic function measures and weight per log unit increase in urinary phthalate metabolite concentrations. Models are adjusted for maternal age, maternal pre-pregnancy BMI, parity, ethnicity, education, maternal smoking, maternal alcohol, folic acid supplementation, gestational age at time of measurement and creatinine. \*P-value<0.05. †Significant with Bonferroni correction.
