# Supplementary material
Source: PubMed Central journal article supplement (PMC6343467)
Supplement: dey364_supplement_table6.pdf [file dey364_supplement_table6.pdf]

**Supplementary Table SVI Longitudinal associations of bisphenol and phthalate concentrations and placental hemodynamic function markers<sup>a</sup>.**

|                           | Umbilical artery pulsatility index, SD (95% CI) (n = 1217) |                        | Uterine artery resistance index, SD (95% CI) (n = 1134) |                     |
|---------------------------|------------------------------------------------------------|------------------------|---------------------------------------------------------|---------------------|
|                           | Intercept <sup>b</sup>                                     | Slope <sup>c</sup>     | Intercept <sup>b</sup>                                  | Slope <sup>c</sup>  |
| Total bisphenols          | 0.16 (0.02, 0.31)*                                         | -0.01 (-0.01, -0.00)*  | -1.77 (-2.93, -0.60)*†                                  | 0.09 (0.03, 0.14)*† |
| Bisphenol A               | 0.15 (0.03, 0.26)*†                                        | -0.01 (-0.01, -0.00)*† | -1.28 (-2.24, -0.33)*†                                  | 0.06 (0.02, 0.11)*† |
| Bisphenol S               | 0.04 (-0.07, 0.15)                                         | -0.00 (-0.01, 0.00)    | -0.62 (-1.50, 0.26)                                     | 0.03 (-0.01, 0.07)  |
| Phthalic acid             | 0.08 (-0.08, 0.24)                                         | -0.00 (-0.01, 0.00)    | -0.49 (-1.89, 0.91)                                     | 0.03 (-0.04, 0.09)  |
| LMW phthalate metabolites | 0.04 (-0.09, 0.17)                                         | -0.00 (-0.01, 0.00)    | 0.04 (-1.10, 1.19)                                      | -0.00 (-0.06, 0.06) |
| HMW phthalate metabolites | 0.16 (-0.02, 0.34)                                         | -0.01 (-0.01, -0.01)*  | 0.30 (-1.04, 1.63)                                      | -0.01 (-0.08, 0.05) |
| DEHP metabolites          | 0.15 (-0.03, 0.32)                                         | -0.01 (-0.01, -0.00)*  | 0.31 (-0.98, 1.59)                                      | -0.01 (-0.08, 0.05) |
| DNOP metabolites          | 0.10 (-0.07, 0.27)                                         | -0.00 (-0.01, 0.00)    | 0.32 (-1.06, 1.70)                                      | -0.01 (-0.08, 0.05) |

<sup>a</sup>Change in umbilical artery pulsatility index and uterine artery resistance index per natural log unit increase of Total bisphenols/BPA/BPS/Phthalic acid/LMW/HMW/DEHP/DNOP metabolite concentrations based on repeated measurement analysis (hemodynamic function marker Z-score =  $\beta_0 + \beta_1 \times \log \text{ unit compound} + \beta_2 \times \text{gestational age} + \beta_3 \times \log \text{ unit compound} \times \text{gestational age} + \beta_4 \times \text{additional covariates}$ ).

<sup>b</sup>Values are regression coefficients (95% CI) from multivariable unbalanced repeated measurement regression models that reflect the change in hemodynamic function marker per natural log unit increase of Total bisphenols/BPA/BPS/Phthalic acid/LMW/HMW/DEHP/DNOP metabolite concentrations ( $\beta_2$ ).

<sup>c</sup>Values are regression coefficients (95% CI) from multivariable unbalanced repeated measurement regression models that reflect the change in hemodynamic function marker in mmHg per natural log unit increase of Total bisphenols/BPA/BPS/Phthalic acid/LMW/HMW/DEHP/DNOP metabolite concentrations per gestational age in weeks ( $\beta_4$ ).

Models were adjusted for maternal age, maternal pre-pregnancy BMI, parity, ethnicity, education, maternal smoking, maternal alcohol, folic acid supplementation and urinary creatinine.

\*P-value <0.05. †Significant with Bonferroni correction.
