# Supplementary material
Source: PubMed Central journal article supplement (PMC6343467)
Supplement: dey364_supplement_table7.pdf [file dey364_supplement_table7.pdf]

**Supplementary Table SVII Longitudinal associations of bisphenol and phthalate concentrations and blood pressure.**

|                           | Systolic blood pressure (mmHg), $\beta$ (95% CI) <sup>a</sup> |                     |                     |                     | Diastolic blood pressure (mmHg), $\beta$ (95% CI) <sup>b</sup> |                       |                     |                     |
|---------------------------|---------------------------------------------------------------|---------------------|---------------------|---------------------|----------------------------------------------------------------|-----------------------|---------------------|---------------------|
|                           | Intercept <sup>c</sup>                                        |                     | Slope <sup>d</sup>  |                     | Intercept <sup>c</sup>                                         |                       | Slope <sup>d</sup>  |                     |
|                           | Basic model                                                   | Adjusted model      | Basic model         | Adjusted model      | Basic model                                                    | Adjusted model        | Basic model         | Adjusted model      |
| Total bisphenols          | -0.16 (-0.94, 0.61)                                           | -0.31 (-1.07, 0.35) | -0.01 (-0.02, 0.04) | 0.01 (-0.02, 0.04)  | -0.22 (-0.85, 0.41)                                            | -0.36 (-0.97, 0.26)   | 0.01 (-0.01, 0.03)  | 0.01 (-0.01, 0.04)  |
| Bisphenol A               | -0.09 (-0.71, 0.52)                                           | -0.19 (-0.79, 0.41) | 0.01 (-0.02, 0.03)  | 0.01 (-0.02, 0.03)  | -0.11 (-0.61, 0.39)                                            | -0.23 (-0.72, 0.26)   | 0.01 (-0.01, 0.02)  | 0.01 (-0.01, 0.03)  |
| Bisphenol S               | -0.18 (-0.76, 0.40)                                           | -0.30 (-0.86, 0.27) | 0.01 (-0.01, 0.03)  | 0.01 (-0.01, 0.03)  | -0.10 (-0.58, 0.37)                                            | -0.18 (-0.64, 0.28)   | 0.01 (-0.01, 0.03)  | 0.01 (-0.01, 0.03)  |
| Phthalic acid             | 0.52 (-0.33, 1.37)                                            | 0.18 (-0.65, 1.01)  | 0.00 (-0.03, 0.03)  | 0.00 (-0.03, 0.03)  | 0.23 (-0.47, 0.92)                                             | -0.13 (-0.80, 0.55)   | -0.01 (-0.02, 0.03) | 0.01 (-0.02, 0.04)  |
| LMW phthalate metabolites | 0.30 (-0.40, 1.00)                                            | 0.14 (-0.53, 0.82)  | -0.00 (-0.03, 0.02) | -0.01 (-0.03, 0.02) | 0.33 (-0.23, 0.89)                                             | 0.11 (-0.44, 0.65)    | 0.00 (-0.02, 0.02)  | -0.00 (-0.02, 0.02) |
| HMW phthalate metabolites | -0.09 (-1.06, 0.87)                                           | -0.15 (-1.09, 0.79) | -0.00 (-0.04, 0.04) | -0.00 (-0.04, 0.04) | -0.30 (-1.08, 0.49)                                            | -0.56 (-1.33, 0.20)   | 0.02 (-0.01, 0.05)  | 0.02 (-0.01, 0.05)  |
| DEHP metabolites          | -0.04 (-0.98, 0.89)                                           | -0.05 (-0.96, 0.86) | -0.00 (-0.04, 0.03) | -0.00 (-0.04, 0.03) | -0.28 (-1.05, 0.48)                                            | -0.46 (-1.20, 0.28)   | 0.01 (-0.02, 0.04)  | 0.01 (-0.02, 0.04)  |
| DNOP metabolites          | -0.66 (-1.58, 0.26)                                           | -0.62 (-1.52, 0.27) | 0.01 (-0.02, 0.05)  | 0.02 (-0.02, 0.05)  | -0.71 (-1.45, 0.04)                                            | -0.80 (-1.52, -0.07)* | 0.02 (-0.01, 0.05)  | 0.02 (-0.00, 0.05)  |

<sup>a</sup>Change in systolic blood pressure in mmHg per natural log unit increase of Total bisphenols/BPA/BPS/Phthalic acid/LMW/HMW/DEHP/DNOP metabolite concentrations based on repeated measurement analysis (systolic blood pressure =  $\beta_0 + \beta_1 \times \log \text{unit compound} + \beta_2 \times \text{gestational age} + \beta_3 \times \text{gestational age}^{-2} + \beta_4 \times \log \text{unit compound} \times \text{gestational age} + \beta_x \times \text{additional covariates}$ ).

<sup>b</sup>Change in diastolic blood pressure in mmHg per natural log unit increase of Total bisphenols/BPA/BPS/Phthalic acid/LMW/HMW/DEHP/DNOP metabolite concentrations based on repeated measurement analysis (diastolic blood pressure =  $\beta_0 + \beta_1 \times \log \text{unit compound} + \beta_2 \times \text{gestational age} + \beta_3 \times \text{gestational age}^{0.5} + \beta_4 \times \log \text{unit compound} \times \text{gestational age} + \beta_x \times \text{additional covariates}$ ).

<sup>c</sup>Values are regression coefficients (95% CI) from multivariable unbalanced repeated measurement regression models that reflect the change in blood pressure in mmHg per natural log unit increase of Total bisphenols/BPA/BPS/Phthalic acid/LMW/HMW/DEHP/DNOP metabolite concentrations ( $\beta_2$ ).

<sup>d</sup>Values are regression coefficients (95% CI) from multivariable unbalanced repeated measurement regression models that reflect the change in blood pressure in mmHg per natural log unit increase of Total bisphenols/BPA/BPS/Phthalic acid/LMW/HMW/DEHP/DNOP metabolite concentrations per gestational age in weeks ( $\beta_4$ ).

Basic models were adjusted for urinary creatinine. Adjusted models were additionally adjusted for maternal age, maternal pre-pregnancy BMI, parity, ethnicity, education, maternal smoking, maternal alcohol and folic acid supplementation.

\*P-value <0.05.

mmHg = millimeters of mercury.
