# Supplementary material
Source: PubMed Central journal article supplement (PMC6343467)
Supplement: dey364_supplement_table8.pdf [file dey364_supplement_table8.pdf]

**Supplementary Table SVIII** Longitudinal univariate associations between tertiles of bisphenol and phthalate concentrations and blood pressure<sup>a</sup>.

| <b>Total bisphenols per gram creatinine in tertiles</b> | <b>Difference in systolic blood pressure</b>  |                            |                                        |                            |
|---------------------------------------------------------|-----------------------------------------------|----------------------------|----------------------------------------|----------------------------|
|                                                         | <b>Intercept (mmHg)</b>                       | <b>P-value<sup>b</sup></b> | <b>Slope (mmHg/ week of gestation)</b> | <b>P-value<sup>b</sup></b> |
| First tertile                                           | 110.6                                         |                            | Reference                              |                            |
| Second tertile                                          | 110.5                                         | <i>P</i> = 0.920           | 0.03                                   | <i>P</i> = 0.527           |
| Third tertile                                           | 110.6                                         | <i>P</i> = 0.999           | 0.01                                   | <i>P</i> = 0.867           |
| <b>Total bisphenols per gram creatinine in tertiles</b> | <b>Difference in diastolic blood pressure</b> |                            |                                        |                            |
|                                                         | <b>Intercept (mmHg)</b>                       | <b>P-value<sup>b</sup></b> | <b>Slope (mmHg/week of gestation)</b>  | <b>P-value<sup>b</sup></b> |
| First tertile                                           | 97.2                                          |                            | Reference                              |                            |
| Second tertile                                          | 97.9                                          | <i>P</i> = 0.445           | -0.02                                  | <i>P</i> = 0.638           |
| Third tertile                                           | 97.6                                          | <i>P</i> = 0.677           | -0.01                                  | <i>P</i> = 0.889           |
| <b>BPA per gram creatinine in tertiles</b>              | <b>Difference in systolic blood pressure</b>  |                            |                                        |                            |
|                                                         | <b>Intercept (mmHg)</b>                       | <b>P-value<sup>b</sup></b> | <b>Slope (mmHg/week of gestation)</b>  | <b>P-value<sup>b</sup></b> |
| First tertile                                           | 110.2                                         |                            | Reference                              |                            |
| Second tertile                                          | 111.2                                         | <i>P</i> = 0.398           | -0.03                                  | <i>P</i> = 0.559           |
| Third tertile                                           | 110.3                                         | <i>P</i> = 0.945           | 0.02                                   | <i>P</i> = 0.688           |
| <b>BPA per gram creatinine in tertiles</b>              | <b>Difference in diastolic blood pressure</b> |                            |                                        |                            |
|                                                         | <b>Intercept (mmHg)</b>                       | <b>P-value<sup>b</sup></b> | <b>Slope (mmHg/week of gestation)</b>  | <b>P-value<sup>b</sup></b> |
| First tertile                                           | 97.3                                          |                            | Reference                              |                            |
| Second tertile                                          | 98.3                                          | <i>P</i> = 0.280           | -0.02                                  | <i>P</i> = 0.675           |
| Third tertile                                           | 97.3                                          | <i>P</i> = 0.985           | 0.01                                   | <i>P</i> = 0.765           |
| <b>BPS per gram creatinine in tertiles</b>              | <b>Difference in systolic blood pressure</b>  |                            |                                        |                            |
|                                                         | <b>Intercept (mmHg)</b>                       | <b>P-value<sup>b</sup></b> | <b>Slope (mmHg/week of gestation)</b>  | <b>P-value<sup>b</sup></b> |
| First tertile                                           | 110.4                                         |                            | Reference                              |                            |
| Second tertile                                          | 111.4                                         | <i>P</i> = 0.388           | 0.02                                   | <i>P</i> = 0.661           |
| Third tertile                                           | 110.0                                         | <i>P</i> = 0.763           | 0.06                                   | <i>P</i> = 0.166           |
| <b>BPS per gram creatinine in tertiles</b>              | <b>Difference in diastolic blood pressure</b> |                            |                                        |                            |
|                                                         | <b>Intercept (mmHg)</b>                       | <b>P-value<sup>b</sup></b> | <b>Slope (mmHg/week of gestation)</b>  | <b>P-value<sup>b</sup></b> |
| First tertile                                           | 97.5                                          |                            | Reference                              |                            |
| Second tertile                                          | 97.8                                          | <i>P</i> = 0.766           | 0.05                                   | <i>P</i> = 0.173           |
| Third tertile                                           | 97.7                                          | <i>P</i> = 0.873           | 0.04                                   | <i>P</i> = 0.263           |
| <b>Phthalic acid per gram creatinine in tertiles</b>    | <b>Difference in systolic blood pressure</b>  |                            |                                        |                            |
|                                                         | <b>Intercept (mmHg)</b>                       | <b>P-value<sup>b</sup></b> | <b>Slope (mmHg/week of gestation)</b>  | <b>P-value<sup>b</sup></b> |
| First tertile                                           | 110.0                                         |                            | Reference                              |                            |
| Second tertile                                          | 110.1                                         | <i>P</i> = 0.881           | 0.00                                   | <i>P</i> = 0.993           |
| Third tertile                                           | 111.7                                         | <i>P</i> = 0.152           | 0.01                                   | <i>P</i> = 0.802           |
| <b>Phthalic acid per gram creatinine in tertiles</b>    | <b>Difference in diastolic blood pressure</b> |                            |                                        |                            |
|                                                         | <b>Intercept (mmHg)</b>                       | <b>P-value<sup>b</sup></b> | <b>Slope (mmHg/week of gestation)</b>  | <b>P-value<sup>b</sup></b> |
| First tertile                                           | 96.7                                          |                            | Reference                              |                            |
| Second tertile                                          | 97.9                                          | <i>P</i> = 0.231           | -0.02                                  | <i>P</i> = 0.573           |
| Third tertile                                           | 98.5                                          | <i>P</i> = 0.064           | -0.00                                  | <i>P</i> = 0.988           |

Continued

**Supplementary Table SVIII** *Continued*

| <b>LMW phthalate metabolites per gram creatinine in tertiles</b> | <b>Difference in systolic blood pressure</b>  |                            | <b>Slope (mmHg/week of gestation)</b> | <b>P-value<sup>b</sup></b> |
|------------------------------------------------------------------|-----------------------------------------------|----------------------------|---------------------------------------|----------------------------|
|                                                                  | <b>Intercept (mmHg)</b>                       | <b>P-value<sup>b</sup></b> |                                       |                            |
| First tertile                                                    | 109.2                                         |                            | <i>Reference</i>                      |                            |
| Second tertile                                                   | 110.3                                         | <i>P</i> = 0.358           | 0.01                                  | <i>P</i> = 0.892           |
| Third tertile                                                    | 112.2                                         | <i>P</i> = 0.013*          | -0.06                                 | <i>P</i> = 0.211           |
| <b>LMW phthalate metabolites per gram creatinine in tertiles</b> | <b>Difference in diastolic blood pressure</b> |                            | <b>Slope (mmHg/week of gestation)</b> | <b>P-value<sup>b</sup></b> |
|                                                                  | <b>Intercept (mmHg)</b>                       | <b>P-value<sup>b</sup></b> |                                       |                            |
| First tertile                                                    | 96.5                                          |                            | <i>Reference</i>                      |                            |
| Second tertile                                                   | 97.4                                          | <i>P</i> = 0.392           | 0.01                                  | <i>P</i> = 0.832           |
| Third tertile                                                    | 99.0                                          | <i>P</i> = 0.013*          | -0.03                                 | <i>P</i> = 0.443           |
| <b>HMW phthalate metabolites per gram creatinine in tertiles</b> | <b>Difference in systolic blood pressure</b>  |                            | <b>Slope (mmHg/week of gestation)</b> | <b>P-value<sup>b</sup></b> |
|                                                                  | <b>Intercept (mmHg)</b>                       | <b>P-value<sup>b</sup></b> |                                       |                            |
| First tertile                                                    | 109.7                                         |                            | <i>Reference</i>                      |                            |
| Second tertile                                                   | 110.6                                         | <i>P</i> = 0.454           | -0.03                                 | <i>P</i> = 0.232           |
| Third tertile                                                    | 111.4                                         | <i>P</i> = 0.161           | -0.06                                 | <i>P</i> = 0.528           |
| <b>HMW phthalate metabolites per gram creatinine in tertiles</b> | <b>Difference in diastolic blood pressure</b> |                            | <b>Slope (mmHg/week of gestation)</b> | <b>P-value<sup>b</sup></b> |
|                                                                  | <b>Intercept (mmHg)</b>                       | <b>P-value<sup>b</sup></b> |                                       |                            |
| First tertile                                                    | 97.4                                          |                            | <i>Reference</i>                      |                            |
| Second tertile                                                   | 97.5                                          | <i>P</i> = 0.911           | 0.00                                  | <i>P</i> = 0.920           |
| Third tertile                                                    | 97.7                                          | <i>P</i> = 0.789           | 0.02                                  | <i>P</i> = 0.587           |
| <b>DEHP metabolites per gram creatinine in tertiles</b>          | <b>Difference in systolic blood pressure</b>  |                            | <b>Slope (mmHg/week of gestation)</b> | <b>P-value<sup>b</sup></b> |
|                                                                  | <b>Intercept (mmHg)</b>                       | <b>P-value<sup>b</sup></b> |                                       |                            |
| First tertile                                                    | 109.3                                         |                            | <i>Reference</i>                      |                            |
| Second tertile                                                   | 111.2                                         | <i>P</i> = 0.113           | -0.09                                 | <i>P</i> = 0.055           |
| Third tertile                                                    | 110.9                                         | <i>P</i> = 0.168           | -0.08                                 | <i>P</i> = 0.097           |
| <b>DEHP metabolites per gram creatinine in tertiles</b>          | <b>Difference in diastolic blood pressure</b> |                            | <b>Slope (mmHg/week of gestation)</b> | <b>P-value<sup>b</sup></b> |
|                                                                  | <b>Intercept (mmHg)</b>                       | <b>P-value<sup>b</sup></b> |                                       |                            |
| First tertile                                                    | 97.3                                          |                            | <i>Reference</i>                      |                            |
| Second tertile                                                   | 97.8                                          | <i>P</i> = 0.595           | -0.01                                 | <i>P</i> = 0.714           |
| Third tertile                                                    | 97.7                                          | <i>P</i> = 0.702           | -0.00                                 | <i>P</i> = 0.942           |
| <b>DNOP metabolites per gram creatinine in tertiles</b>          | <b>Difference in systolic blood pressure</b>  |                            | <b>Slope (mmHg/week of gestation)</b> | <b>P-value<sup>b</sup></b> |
|                                                                  | <b>Intercept (mmHg)</b>                       | <b>P-value<sup>b</sup></b> |                                       |                            |
| First tertile                                                    | 110.8                                         |                            | <i>Reference</i>                      |                            |
| Second tertile                                                   | 110.1                                         | <i>P</i> = 0.568           | 0.00                                  | <i>P</i> = 0.998           |
| Third tertile                                                    | 111.0                                         | <i>P</i> = 0.832           | 0.01                                  | <i>P</i> = 0.844           |

*Continued*

**Supplementary Table SVIII** *Continued*

| <b>DNOP metabolites per gram creatinine in tertiles</b> | <b>Difference in diastolic blood pressure</b> |                            | <b>Slope (mmHg/week of gestation)</b> | <b>P-value<sup>b</sup></b> |
|---------------------------------------------------------|-----------------------------------------------|----------------------------|---------------------------------------|----------------------------|
|                                                         | <b>Intercept (mmHg)</b>                       | <b>P-value<sup>b</sup></b> |                                       |                            |
| First tertile                                           | 98.1                                          |                            | <i>Reference</i>                      |                            |
| Second tertile                                          | 97.4                                          | <i>P</i> = 0.474           | 0.02                                  | <i>P</i> = 0.675           |
| Third tertile                                           | 97.0                                          | <i>P</i> = 0.233           | 0.05                                  | <i>P</i> = 0.151           |

<sup>a</sup>Values are based on repeated non-linear regression models and reflect the change in blood pressure in mmHg per tertile of Total bisphenols/BPA/BPS/Phthalic acid/LMW/HMW/DEHP/DNOP metabolite concentrations in µg/g or µmol/g creatinine compared to the reference group of women in the first tertile.

<sup>b</sup>P-value reflects the significance level of the estimate compared to the reference (the first tertile). \*P-value <0.05.
