# Supplementary material
Source: PubMed Central journal article supplement (PMC6343467)
Supplement: dey364_supplement_table9.pdf [file dey364_supplement_table9.pdf]

**Supplementary Table SIX Associations of early pregnancy bisphenol and phthalate urine concentrations with gestational hypertensive disorders (N = 1219).**

|                           | Gestational hypertension, OR (95% CI) (n = 40) |                   | Pre-eclampsia, OR (95% CI) (n = 24) |                   |
|---------------------------|------------------------------------------------|-------------------|-------------------------------------|-------------------|
|                           | Basic model                                    | Adjusted model    | Basic model                         | Adjusted model    |
| LMW phthalate metabolites |                                                |                   |                                     |                   |
| mMP metabolites           | 1.02 (0.75, 1.37)                              | 1.08 (0.79, 1.47) | 1.17 (0.82, 1.67)                   | 1.16 (0.79, 1.70) |
| mEP metabolites           | 1.14 (0.93, 1.38)                              | 1.10 (0.90, 1.35) | 1.04 (0.81, 1.32)                   | 1.00 (0.77, 1.28) |
| mIBP metabolites          | 1.11 (0.86, 1.44)                              | 1.18 (0.89, 1.56) | 0.96 (0.69, 1.33)                   | 0.92 (0.65, 1.30) |
| mBP metabolites           | 1.09 (0.83, 1.44)                              | 1.11 (0.83, 1.48) | 1.15 (0.81, 1.64)                   | 1.09 (0.76, 1.56) |
| HMW phthalate metabolites |                                                |                   |                                     |                   |
| mECP metabolites          | 1.02 (0.75, 1.38)                              | 1.01 (0.73, 1.39) | 1.03 (0.70, 1.51)                   | 0.97 (0.66, 1.44) |
| mEHHP metabolites         | 1.03 (0.78, 1.37)                              | 1.05 (0.79, 1.41) | 1.15 (0.80, 1.66)                   | 1.10 (0.76, 1.58) |
| mEOHP metabolites         | 1.05 (0.80, 1.38)                              | 1.06 (0.80, 1.40) | 1.09 (0.77, 1.55)                   | 1.04 (0.74, 1.46) |
| mCMHP metabolites         | 1.06 (0.77, 1.48)                              | 1.09 (0.77, 1.55) | 0.96 (0.63, 1.46)                   | 0.91 (0.59, 1.40) |
| mCPP metabolites          | 0.95 (0.70, 1.30)                              | 0.98 (0.70, 1.38) | 1.13 (0.76, 1.69)                   | 1.07 (0.71, 1.62) |
| mBzP metabolites          | 1.02 (0.83, 1.25)                              | 1.00 (0.80, 1.24) | 0.95 (0.74, 1.22)                   | 0.90 (0.70, 1.17) |
| mHxP metabolites          | 1.07 (0.85, 1.36)                              | 1.10 (0.86, 1.42) | 1.18 (0.88, 1.58)                   | 1.14 (0.84, 1.54) |
| mHpP metabolites          | 1.25 (0.96, 1.64)                              | 1.30 (0.97, 1.74) | 1.10 (0.78, 1.56)                   | 1.04 (0.72, 1.49) |

Increases are per log unit in urinary phthalate metabolite concentrations.

Basic models are adjusted for creatinine. Adjusted models are adjusted for maternal age, maternal pre-pregnancy BMI, parity, ethnicity, education, maternal smoking, maternal alcohol, folic acid supplementation and creatinine.
